# Supplementary material for: Filamin C promotes lymphatic invasion and lymphatic metastasis and increases cell motility by regulating Rho GTPase in esophageal squamous cell carcinoma
Source: PubMed Central journal article supplement (PMC5351637; doi:10.18632/oncotarget.14087), 2016-12-22
Supplement: oncotarget-08-6353-s001.pdf [file oncotarget-08-6353-s001.pdf]

## Filamin C promotes lymphatic invasion and lymphatic metastasis and increases cell motility by regulating Rho GTPase in esophageal squamous cell carcinoma

### Supplementary Materials

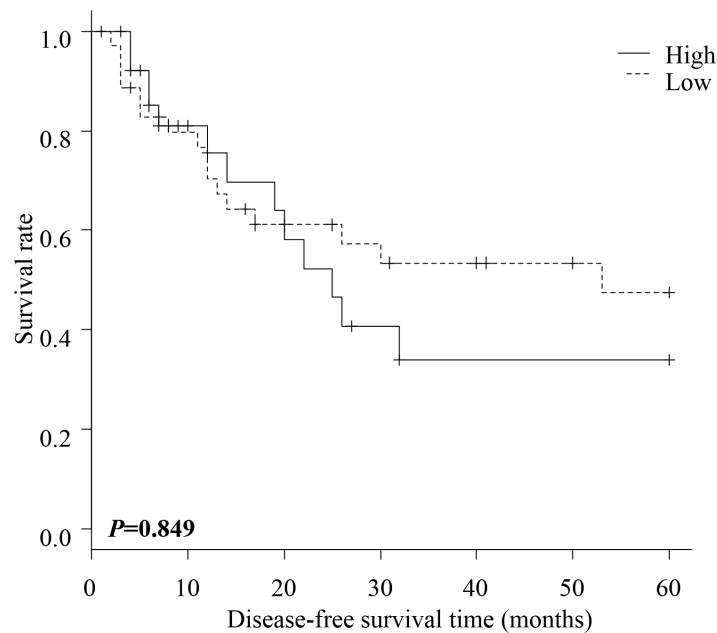

**Supplementary Figure S1: Disease free survival of patients with ESCC Disease free survival of ESCC patients within high and low FLNC expression groups.** There was no statistically significant difference observed. Survival rates were calculated using the Kaplan Meier method and differences in survival were estimated by Wilcoxon test.

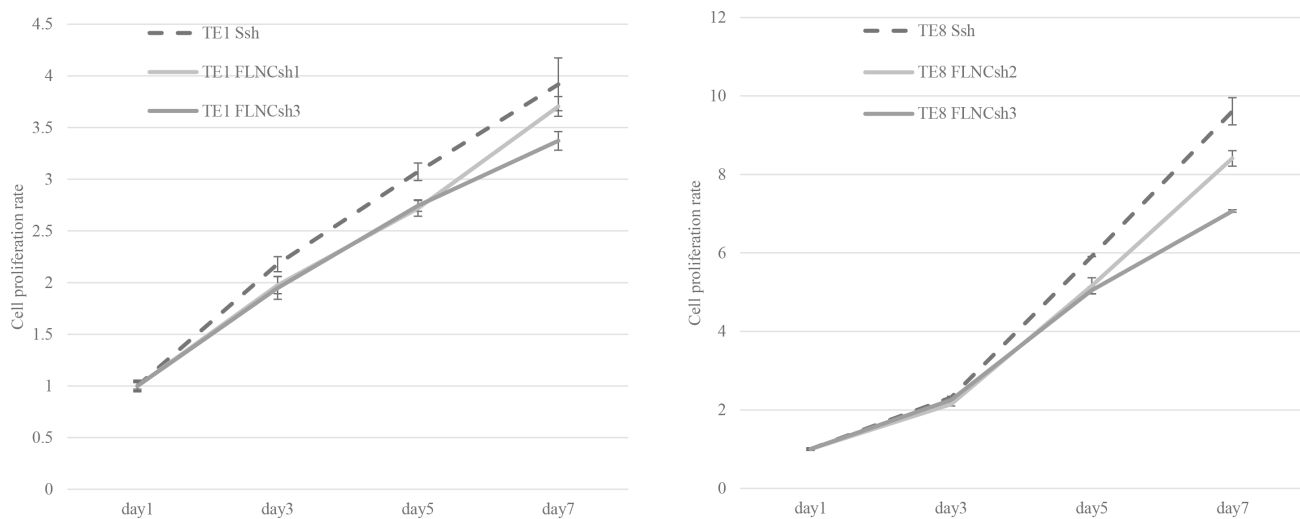

**Supplementary Figure S2: Cell proliferation assay of shRNA infected ESCC cell lines Equal numbers of cells ( $1 \times 10^3$ ) were inoculated into each well and incubated for 1, 3, 5, and 7 days. Cell viability was measured using the MTT assay.**

**Supplementary Table S1: FLNC shRNAs sequences**

| <b>Construct name</b> | <b>sequences</b>                                                                                                                                                                                |
|-----------------------|-------------------------------------------------------------------------------------------------------------------------------------------------------------------------------------------------|
| FLNC shRNA1           | (sense) 5'-GATCCCCGTACCTTTGACATCTACTACAACGTGTGCTGTCCGTTGTAGTAGATGTCAAAGGTACTTTTTGGAAAT-3'<br>(antisense) 5'-CTAGATTTCCAAAAAGTACCTTTGACATCTACTACAACGGACAGCACACGTTGTAGTAGATGTCAAAGGTACGGG-3'      |
| FLNC shRNA2           | (sense) 5'-GATCCCCGACTTCAAGGTGTTTACCAAGACGTGTGCTGTCCGTCTTGGTAAACA<br>CCTTGAAGTCTTTTTGGAAAT-3'<br>(antisense) 5'-CTAGATTTCCAAAAAGACTTCAAGGTGTTTACCAAGACGGACAGCACACGTTCTTGGTAAACACCTTGAAGTCGGG-3' |
| FLNC shRNA3           | (sense) 5'-GATCCCCGATTACGTCCTCGTTGTCAACGTGTGCTGTCCGTTGACAATGAGGATGTAGTCTTTTTGGAAAT-3'<br>(antisense) 5'-CTAGATTTCCAAAAAGACTACATCCTCATTGTCAACGGACAGCACACGTTGACAACGAGGACGTAATCGGG-3'              |

**Supplementary Table S2: The human FLNs Primers and GAPDH primers**

| <b>Construct name</b> | <b>primer pair</b>                                                                            |
|-----------------------|-----------------------------------------------------------------------------------------------|
| FLNA                  | (forward primer) 5'-GCAACCTGACGGAGACCTAC-3'<br>(reverse primer) 5'-TGAACCTGTTGGGCTTGTTG-3'    |
| FLNB                  | (forward primer) 5'-AACAGCACGGCCAAGTTCAT-3'<br>(reverse primer) 5'-CTTGCCCACGAGACCACCTT-3'    |
| FLNC                  | (forward primer) 5'-AGTGGCGTCAAGGTCTCAGG-3'<br>(reverse primer) 5'-GCGGTGTAAGTCAAGGTCTCAGG-3' |
| GAPDH                 | (forward primer) 5'-TGCACCACCAACTGCTTAG-3'<br>(reverse primer) 5'-GAGGCAGGGATGATGTTTC-3'      |
